# Supplementary material for: The Use of Pb Isotope Ratios to Determine Environmental Sources of High Blood Pb Concentrations in Children: A Feasibility Study in Georgia
Source: MDPI journal article supplement (doi:10.3390/ijerph192215007), 2022-11-15
Supplement: s1 [file s1]

# **Pb isotope ratios to link environmental sources with high blood Pb concentrations in children: a feasibility study in Georgia**

## **Supplementary Information**

**Adam Laycock<sup>1\*</sup>, Simon Chenery<sup>2</sup>, Elizabeth Marchant<sup>1</sup>, Helen Crabbe<sup>1</sup>, Ayoub Saei<sup>3</sup>, Ekaterine Ruadze<sup>4</sup>, Michael Watts<sup>2</sup>, Giovanni S. Leonardi<sup>1,5</sup>, Tim Marczylo<sup>1</sup>**

<sup>1</sup> UK Health Security Agency, Chemical, Radiation and Environmental Hazards Directorate, Harwell Campus, Chilton, OX11 0RQ, UK

<sup>2</sup> British Geological Survey, Kingsley Durham Centre, Keyworth, Nottingham, NG12 5GG, UK

<sup>3</sup> UK Health Security Agency, Colindale, London, UK

<sup>4</sup> The National Center for Disease Control and Public Health, #99 Kakheti Highway, Tbilisi, Georgia

<sup>5</sup> Department of Public Health, Environments and Society, London School of Hygiene and Tropical Medicine, London, WC1E 7HT, UK

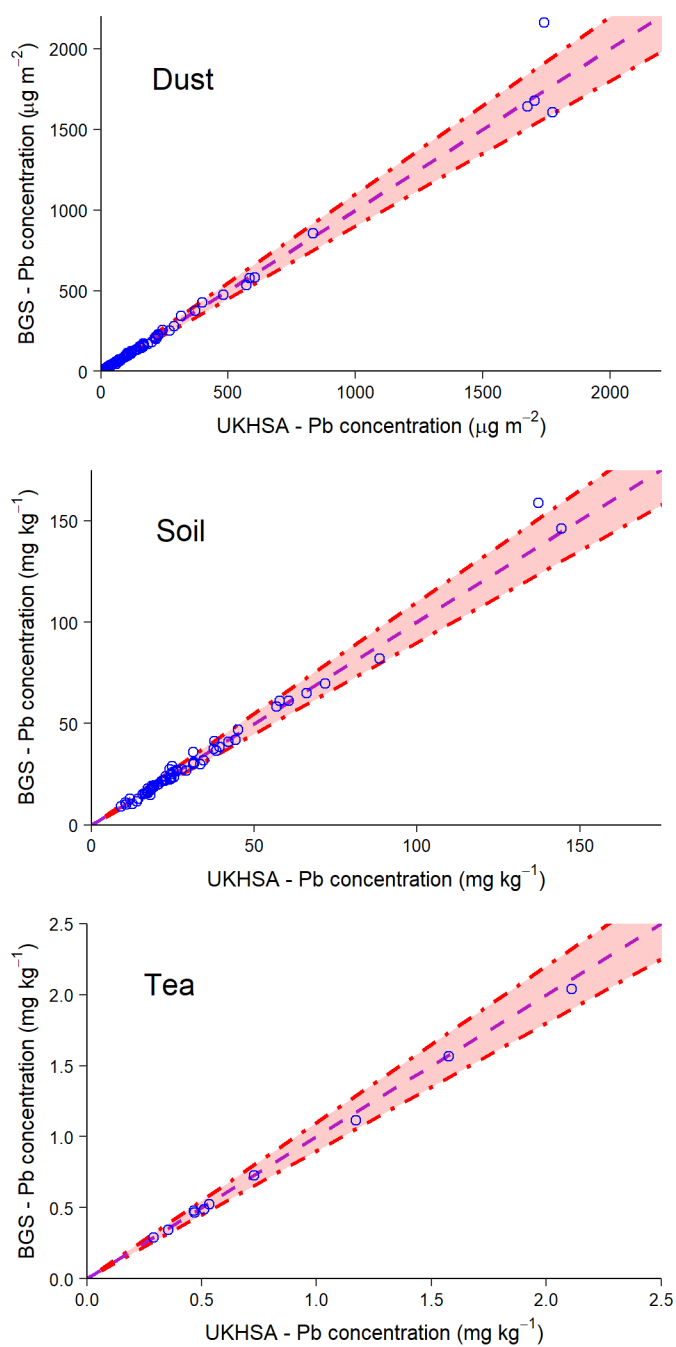

**Figure S1:** Comparison of Pb concentrations of household dust, soil, and tea samples as determined by BGS and UKHSA laboratories. The purple dashed line shows the line  $x=y$  while the shaded red area bound by red dot-dashed lines indicates the 10% confidence interval.

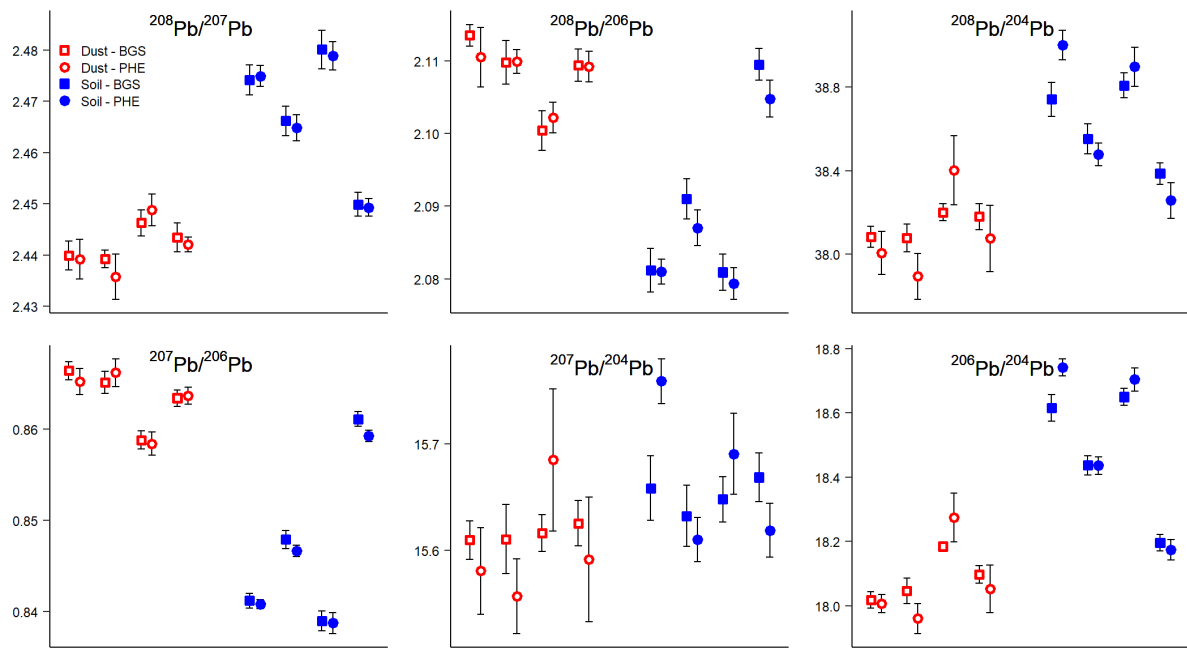

**Figure S2:** Pb isotope ratio data for 4 dust (open red points) and 4 soil (closed blue points) samples as determined by BGS (square points) and UKHSA (circular points) laboratories, error bars are 2 times the standard error of the mean (2SEM).

**Table S1:** Summary of reference materials analysed for total Pb concentration.

| Certified Reference Material                     | Expected Concentration (mg/kg) | Mean Determined Concentration (mg/kg) |       | Mean Recovery (%) |       | Relative Standard Deviation (%) |       |
|--------------------------------------------------|--------------------------------|---------------------------------------|-------|-------------------|-------|---------------------------------|-------|
|                                                  |                                | BGS                                   | UKHSA | BGS               | UKHSA | BGS                             | UKHSA |
| Dust Wipes                                       |                                |                                       |       |                   |       |                                 |       |
| SRM2711a Montana II Soil (n=4)                   | 1400                           | 1364                                  |       | 97                |       | 4.6                             |       |
| SRM2584 Trace Elements in Indoor Dust (n=3)      | 9761                           | 9157                                  |       | 94                |       | 1.6                             |       |
| Soils                                            |                                |                                       |       |                   |       |                                 |       |
| SRM2711a Montana II Soil (n=2)                   | 1400                           | 1389                                  | 1333  | 99                | 95    |                                 |       |
| BCR-2 Basalt Columbia River (n=2)                | 10.59                          | 9.5                                   | 9.6   | 90                | 90    |                                 |       |
| BGS 102 Ironstone Soil (n=2)                     | 79.4                           | 74.2                                  | 77.1  | 93                | 97    |                                 |       |
| Teas                                             |                                |                                       |       |                   |       |                                 |       |
| GBW08505 Tea Leaves (n=4)                        | 1.06                           | 1.03                                  |       | 97                |       | 1                               |       |
| Paint                                            |                                |                                       |       |                   |       |                                 |       |
| Lead in Powdered Paint SQC074 (n=7)              | 1960                           |                                       | 1979  |                   | 101   |                                 | 5     |
| Blood                                            |                                |                                       |       |                   |       |                                 |       |
| Seronorm L-3 Trace Elements in Whole Blood (n=4) | 362                            |                                       | 363.2 |                   | 100   |                                 | 15    |

**Table S2:** Summary of Pb isotope ratio reference material measurements performed by BGS.

| Pb Isotope Ratio                      | 206 / 207 | 206 / 208 | 206 / 204 | 207 / 204 | 207 / 206 | 207 / 208 | 208 / 204 | 208 / 206 | 208 / 204 |
|---------------------------------------|-----------|-----------|-----------|-----------|-----------|-----------|-----------|-----------|-----------|
| GlenDenning UK lead ore –all matrices |           |           |           |           |           |           |           |           |           |
| Expected                              | 1.1787    | 0.4790    | 18.42     | 15.63     | 0.8484    | 0.4064    | 38.46     | 2.0876    | 2.4607    |
| Mean (n=15)                           | 1.1780    | 0.4787    | 18.4221   | 15.6378   | 0.8489    | 0.4064    | 38.4688   | 2.0880    | 2.4601    |
| RSD (%)                               | 0.09      | 0.10      | 0.07      | 0.09      | 0.09      | 0.05      | 0.10      | 0.09      | 0.05      |
| Error (%)                             | -0.05     | -0.06     | 0.01      | 0.03      | 0.05      | -0.01     | 0.02      | 0.02      | -0.03     |
| BCR-2 – soils                         |           |           |           |           |           |           |           |           |           |
| Expected                              | 1.2007    | 0.4842    | 18.7650   | 15.6280   | 0.8328    | 0.4033    | 38.7520   | 2.0651    | 2.4796    |
| Mean (n=4)                            | 1.1996    | 0.4837    | 18.7825   | 15.6568   | 0.8336    | 0.4032    | 38.8263   | 2.0672    | 2.4799    |
| RSD (%)                               | 0.12      | 0.14      | 0.13      | 0.02      | 0.12      | 0.01      | 0.02      | 0.12      | 0.00      |
| Error (%)                             | -0.09     | -0.11     | 0.09      | 0.18      | 0.09      | -0.02     | 0.19      | 0.10      | 0.01      |
